# Supplementary material
Source: PubMed Central journal article supplement (PMC6240730)
Supplement: ddy290_supp.pdf [file ddy290_supp.pdf]

NN nkx2.2a

abnnkx2.2a

NN olig2

abn olig2

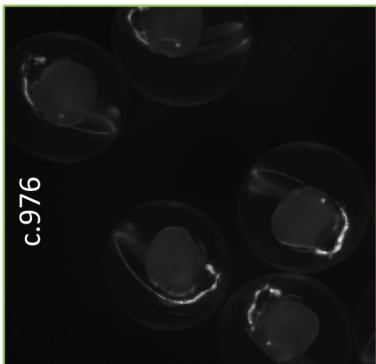

c.976

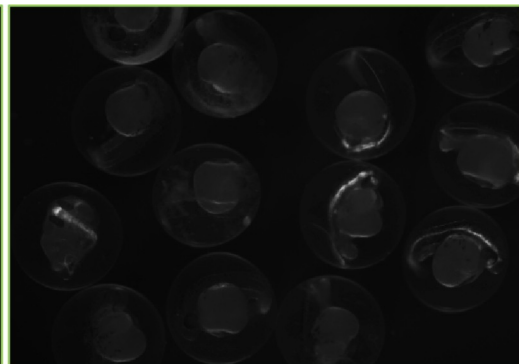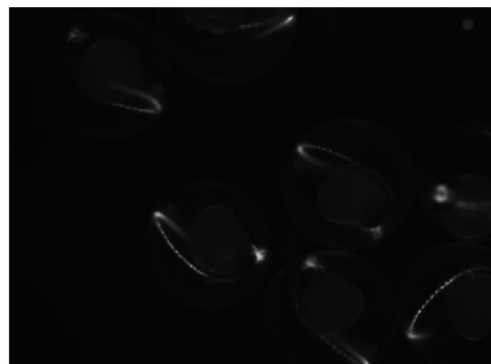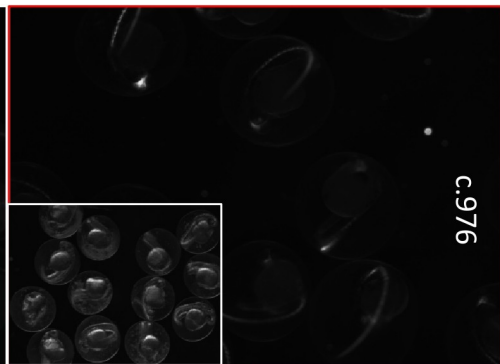

c.976

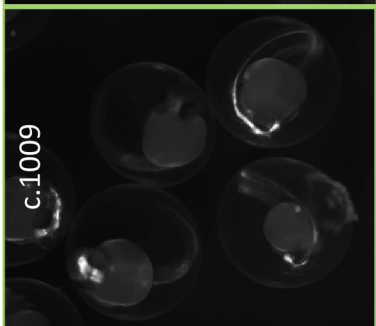

c.1009

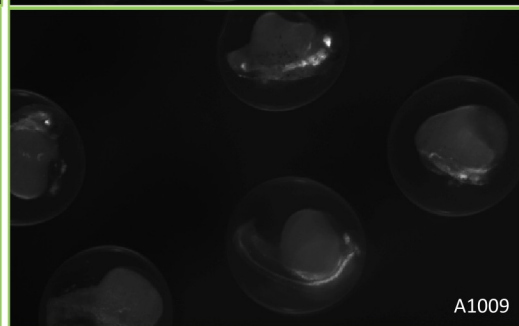

A1009

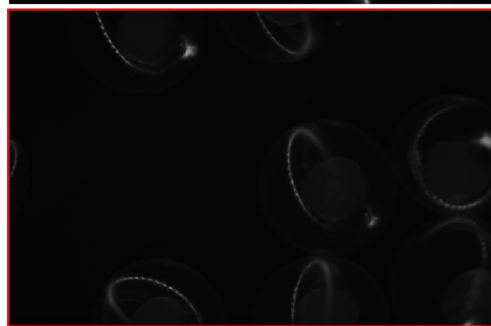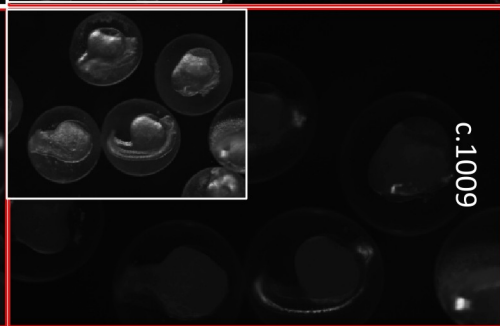

c.1009

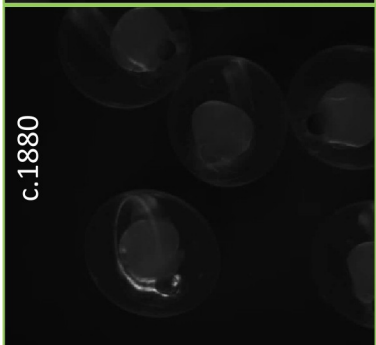

c.1880

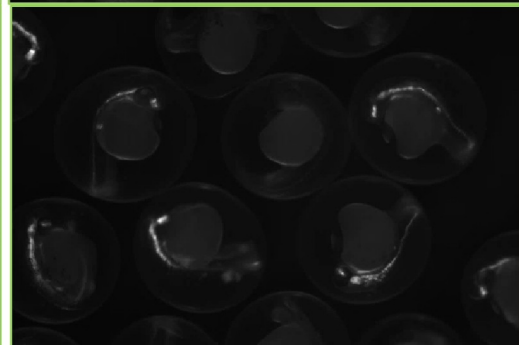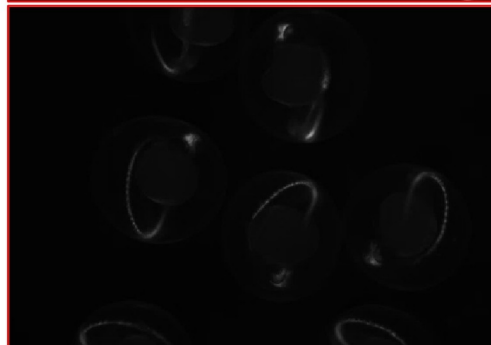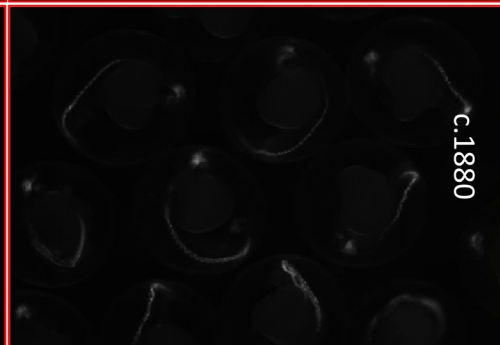

c.1880

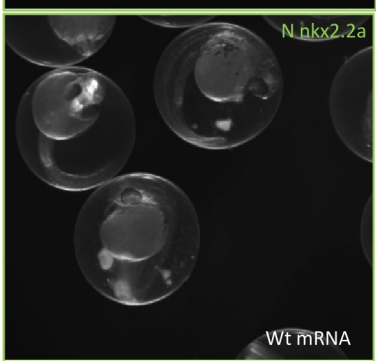

NN nkx2.2a

Wt mRNA

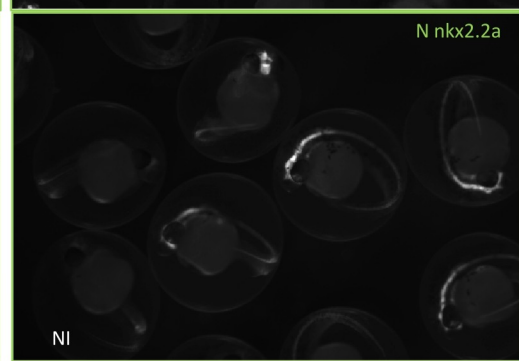

abnnkx2.2a

NI

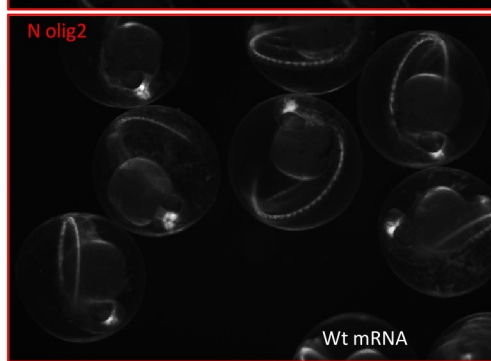

NN olig2

Wt mRNA

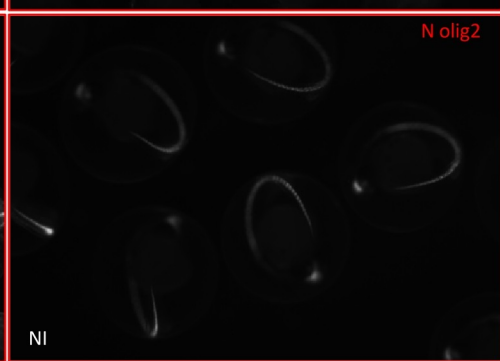

abn olig2

NI

**Legend to Supplementary Figure: Aberrant neural development in mutant mRNA injected embryos at 1 dpf.** Red and green fluorescence driven by the *olig2* promoter and *nkx2.2a* promoter, respectively, are depicted as white. Pictures were taken of embryos injected with mutant or wt-mRNA (600 pg) or of non-injected controls as indicated in the Figure. Mutant injected mRNAs: c.976C>T, p.Arg326Trp, c.1009G>A, p.Glu337Lys, c.1880C>T, p.Ser627Leu. Inlays show prolonged exposure to demonstrate the presence of embryos. The columns headed by NN represent the near normal looking embryos (NN), abn indicates abnormal embryos. The last row only contains normal embryos (N).
